# Supplementary material for: NEMO Prevents RIP Kinase 1-Mediated Epithelial Cell Death and Chronic Intestinal Inflammation by NF-κB-Dependent and -Independent Functions
Source: PubMed Central journal article supplement — Immunity. 2016 Mar 15;44(3):553–67. doi: 10.1016/j.immuni.2016.02.020 (PMC4803910; doi:10.1016/j.immuni.2016.02.020), 2016-03-15
Supplement: mmc1.pdf [file mmc1.pdf]

**Immunity, Volume 44**

**Supplemental Information**

**NEMO Prevents RIP Kinase 1-Mediated Epithelial**

**Cell Death and Chronic Intestinal Inflammation**

**by NF- $\kappa$ B-Dependent and -Independent Functions**

**Katerina Vlantis, Andy Wullaert, Apostolos Polykratis, Vangelis Kondylis, Marius Dannappel, Robin Schwarzer, Patrick Welz, Teresa Corona, Henning Walczak, Falk Weih, Ulf Klein, Michelle Kelliher, and Manolis Pasparakis**

## Supplemental Data Figure 1

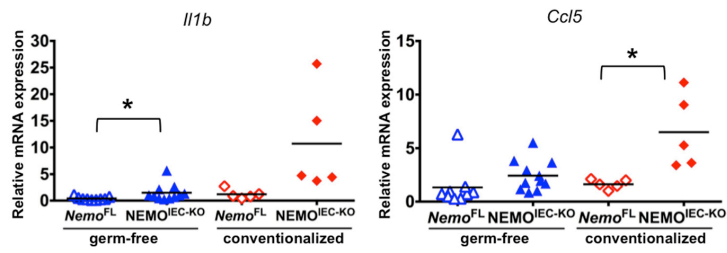

Figure S1 related to Figure 1

### Inflammatory cytokine expression in *NEMO*<sup>IEC-KO</sup> colons is driven by the microbiota

Graphs depicting relative mRNA expression levels of the indicated genes in colons of germ-free and conventionalized *NEMO*<sup>IEC-KO</sup> and *Nemo*<sup>FL</sup> mice (n = 5-11 mice per genotype).

## Supplemental Data Figure 2

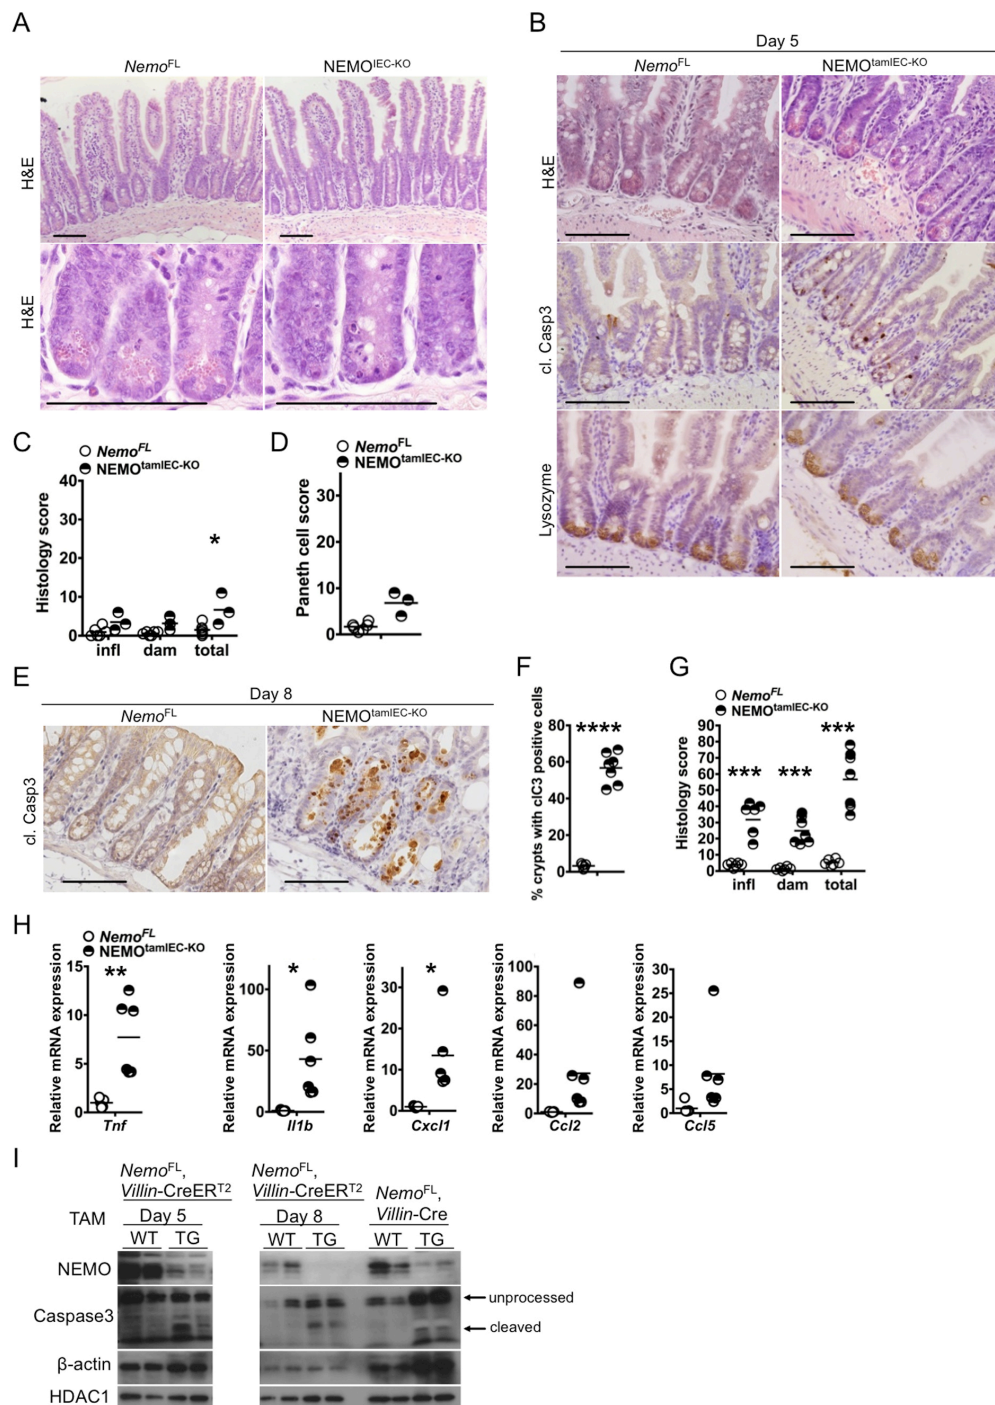

**Figure S2 related to Figure 2**

### Paneth cell deficiency in *NEMO*<sup>IEC-KO</sup> mice is a consequence of cell death

(A) Representative microscopy pictures of ileal sections from *NEMO*<sup>IEC-KO</sup> and *Nemo*<sup>FL</sup> mice stained with H&E at low and high power magnification.

(B) Representative images of ileal sections from *NEMO*<sup>tamIEC-KO</sup> and *Nemo*<sup>FL</sup> mice 5 days after tamoxifen administration.

(C) Graph depicting histopathological scores of ileal sections from *NEMO*<sup>tamIEC-KO</sup> and *Nemo*<sup>FL</sup> mice 5 days after tamoxifen administration (n = 3-6 mice per genotype).

(D) Graph depicting Paneth cell scores of ileal sections from *NEMO*<sup>tamIEC-KO</sup> and *Nemo*<sup>FL</sup> mice 5 days after tamoxifen administration (n = 3-6 mice per genotype).

(E) Representative images of colon sections from NEMO<sup>tamIEC-KO</sup> and *Nemo*<sup>FL</sup> mice on day 8 of tamoxifen administration immunostained for cl. casp3.

(F) Graph depicting percentage of crypts with cl. casp. 3 stained cells on colon sections of NEMO<sup>tamIEC-KO</sup> and *Nemo*<sup>FL</sup> mice 8 days after tamoxifen administration (n = 5-6 mice per genotype).

(G) Graph depicting histopathological scores of colon sections from NEMO<sup>tamIEC-KO</sup> and *Nemo*<sup>FL</sup> mice 8 days after tamoxifen administration (n = 6-7 mice per genotype).

(H) Graphs depicting mRNA levels of the indicated genes in the colon of NEMO<sup>tamIEC-KO</sup> and *Nemo*<sup>FL</sup> littermates 8 days after tamoxifen administration (n = 5-6 mice per genotype).

(I) Immunoblot analysis of protein extracts from primary colon IECs from NEMO<sup>tamIEC-KO</sup> and *Nemo*<sup>FL</sup> littermates 5 and 8 days after tamoxifen administration, and from *Nemo*<sup>FL</sup> and NEMO<sup>IEC-KO</sup> mice probed with the indicated antibodies.

All scale bars represent 100µm.

### Supplemental Data Figure 3

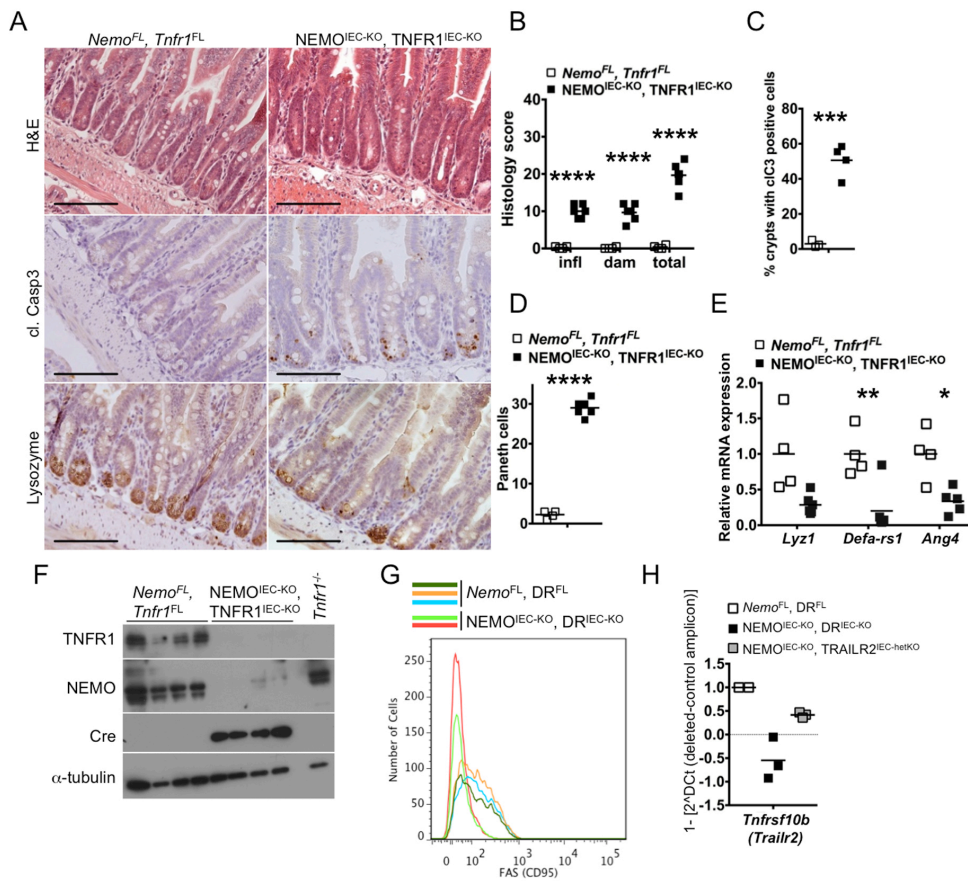

**Figure S3 related to Figure 3**

#### Deficiency of Paneth cells in *NEMO<sup>IEC-KO</sup>* mice is not mediated by TNFR1 induced cell death

(A) Representative images of ileal sections from *NEMO<sup>IEC-KO</sup>, TNFR1<sup>IEC-KO</sup>* and *Nemo<sup>FL</sup>, Tnfr1<sup>FL</sup>* mice stained with H&E or immunostained for cl. casp3 or lysozyme.

(B) Graph depicting histopathological scores of ileal sections from *NEMO<sup>IEC-KO</sup>, TNFR1<sup>IEC-KO</sup>* and *Nemo<sup>FL</sup>, Tnfr1<sup>FL</sup>* mice (n = 4-6 mice per genotype).

(C) Graph depicting percentage of crypts with cl. casp 3 stained cells on ileal sections from *NEMO<sup>IEC-KO</sup>, TNFR1<sup>IEC-KO</sup>* and *Nemo<sup>FL</sup>, Tnfr1<sup>FL</sup>* mice (n = 3-4 mice per genotype).

(D) Graph depicting Paneth cell scores of ileal sections from *NEMO<sup>IEC-KO</sup>, TNFR1<sup>IEC-KO</sup>* and *Nemo<sup>FL</sup>, Tnfr1<sup>FL</sup>* mice (n = 4-6 mice per genotype).

(E) Graph depicting mRNA levels of the indicated genes in the ileum of *NEMO<sup>IEC-KO</sup>, TNFR1<sup>IEC-KO</sup>* and *Nemo<sup>FL</sup>, Tnfr1<sup>FL</sup>* mice (n = 4-6 mice per genotype).

(F) Immunoblot analysis of protein extracts from primary small intestinal IECs from *NEMO<sup>IEC-KO</sup>, TNFR1<sup>IEC-KO</sup>* and *Nemo<sup>FL</sup>, Tnfr1<sup>FL</sup>* mice with the indicated antibodies.

(G) Plot showing FAS (CD95) expression on primary small intestinal IECs (EpCAM<sup>high</sup> living cells) from mice with the indicated genotypes as assessed by FACS (n = 2-3 mice per genotype).

(H) Relative deletion of the loxP flanked sequence in the *Tnfrsf10b (Trailr2)* coding region in genomic DNA from small intestinal IECs of 2 to 3 mice with the indicated genotypes, as assessed by the relative amplification of the deleted locus area versus a control genomic region.

All scale bars represent 100µm.

## Supplemental Data Figure 4

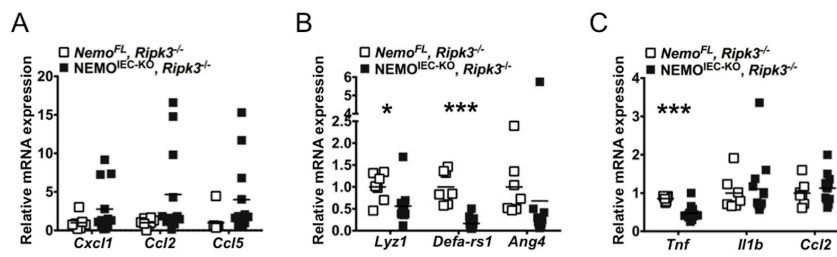

Figure S4 related to Figure 5

### Deletion of RIPK3 ameliorates inflammation in colons of $NEMO^{IEC-KO}$ mice but does not affect Paneth cell deficiency

(A) Graph depicting mRNA levels of the indicated genes in the colon of  $NEMO^{IEC-KO}, Ripk3^{-/-}$  and  $Nemo^{FL}, Ripk3^{-/-}$  mice (n = 8-12 mice per genotype).

(B, C) Graphs depicting mRNA levels of the indicated genes in the ileum of  $NEMO^{IEC-KO}, Ripk3^{-/-}$  and  $Nemo^{FL}, Ripk3^{-/-}$  mice (n = 7-12 mice per genotype).

## Supplemental Data Figure 5

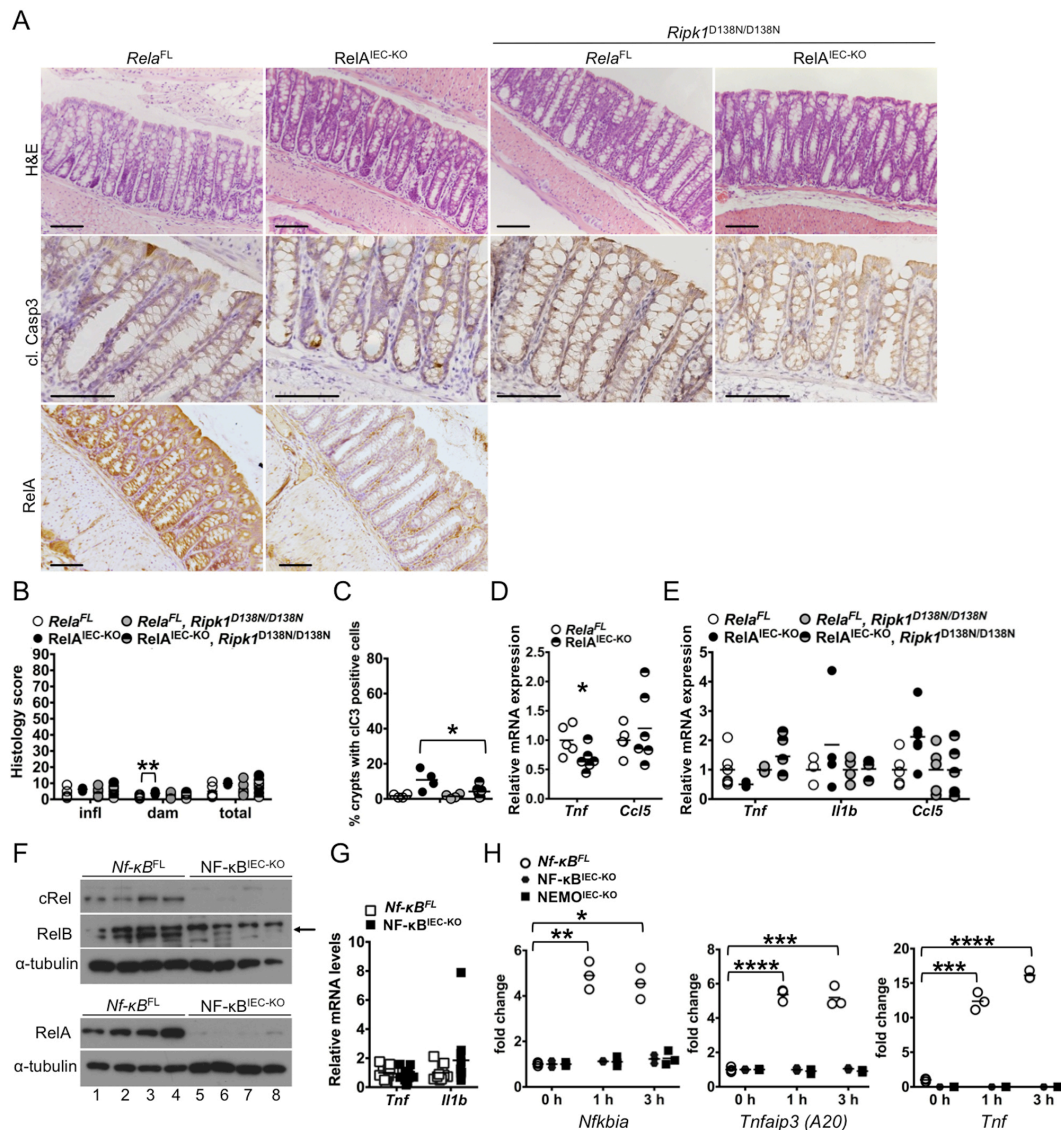

Figure S5 related to Figure 7

### *Rela*<sup>IEC-KO</sup> mice do not develop spontaneous colitis

(A) Representative images of colon sections from *Rela*<sup>IEC-KO</sup> and *Rela*<sup>FL</sup> littermates and *Rela*<sup>IEC-KO</sup>, *Ripk1*<sup>D138N/D138N</sup> and *Rela*<sup>FL</sup>, *Ripk1*<sup>D138N/D138N</sup> littermate mice stained with H&E or immunostained for cl. casp3 or RelA.

(B) Graph depicting histopathological scores of colon sections from *Rela*<sup>IEC-KO</sup> and *Rela*<sup>FL</sup> littermates and *Rela*<sup>IEC-KO</sup>, *Ripk1*<sup>D138N/D138N</sup> and *Rela*<sup>FL</sup>, *Ripk1*<sup>D138N/D138N</sup> littermate mice (n = 5-6 mice per genotype).

(C) Graph depicting percentage of crypts with cl. casp. 3 stained cells on colon sections from *Rela*<sup>IEC-KO</sup> and *Rela*<sup>FL</sup>, *Rela*<sup>IEC-KO</sup>, *Ripk1*<sup>D138N/D138N</sup> and *Rela*<sup>FL</sup>, *Ripk1*<sup>D138N/D138N</sup> mice (n = 4-6 mice per genotype).

(D) Graph depicting mRNA levels of the indicated genes in the colon of *Rela*<sup>IEC-KO</sup> and *Rela*<sup>FL</sup> mice (n = 5-6 mice per genotype).

(E) Graph depicting mRNA levels of the indicated genes in ilea from *Rela*<sup>IEC-KO</sup>, *Rela*<sup>FL</sup>, *Rela*<sup>IEC-KO</sup>, *Ripk1*<sup>D138N/D138N</sup> and *Rela*<sup>FL</sup>, *Ripk1*<sup>D138N/D138N</sup> mice (n = 3-6 mice per genotype).

(F) Immunoblot analysis of protein extracts from primary small intestinal IECs from *Nf-κB*<sup>FL</sup> and *NF-κB*<sup>IEC-KO</sup> mice with the indicated antibodies. Note that the extract in line 6 is derived from a heterozygous *relb*<sup>FL/WT</sup> mouse thus showing reduced levels of RelB protein. Arrow indicates specific band for RelB.

(G) Graph depicting mRNA levels of the indicated genes in the ileum of *Nf-κB*<sup>FL</sup> and *NF-κB*<sup>IEC-KO</sup> littermates (n = 11-12 mice per genotype).

(H) Graphs depicting the fold change of mRNA levels of the indicated NF- $\kappa$ B target genes compared to unstimulated controls in small intestinal organoids from *Nf- $\kappa$ B<sup>FL</sup>*, *NF- $\kappa$ B<sup>IEC-KO</sup>* and *NEMO<sup>IEC-KO</sup>* mice after 1 h and 3 h stimulation with 5 ng/ml murine recombinant TNF. *Tnf* mRNA was not detectable at any time point in organoids from *NF- $\kappa$ B<sup>IEC-KO</sup>* and *NEMO<sup>IEC-KO</sup>* mice. Representative data from one of two independent experiments shown.

All scale bars represent 100 $\mu$ m.



## Supplemental Data Figure 6

**A**

| Parental genotypes           | F: <i>Rela</i> <sup>WT/-</sup> X M: <i>Rela</i> <sup>WT/-</sup> |          |       |
|------------------------------|-----------------------------------------------------------------|----------|-------|
| Born mice                    | expected                                                        | observed |       |
| Genotype                     | %                                                               | n        | %     |
| <i>Rela</i> <sup>WT/WT</sup> | 25.0%                                                           | 11       | 34.4% |
| <i>Rela</i> <sup>WT/-</sup>  | 50.0%                                                           | 21       | 65.6% |
| <i>Rela</i> <sup>-/-</sup>   | 25.0%                                                           | 0        | 0%    |
| Total                        |                                                                 | 32       |       |
| E12.5 – E14.5 Embryos        | expected                                                        | observed |       |
| Genotype                     | %                                                               | n        | %     |
| <i>Rela</i> <sup>WT/WT</sup> | 25.0%                                                           | 9        | 28.1% |
| <i>Rela</i> <sup>WT/-</sup>  | 50.0%                                                           | 14       | 43.8% |
| <i>Rela</i> <sup>-/-</sup>   | 25.0%                                                           | 9        | 28.1% |
| Total                        |                                                                 | 32       |       |

**B**

| Parental genotypes                                         | F: <i>Rela</i> <sup>WT/-</sup> , <i>Tnfr1</i> <sup>-/-</sup> X M: <i>Rela</i> <sup>WT/-</sup> , <i>Tnfr1</i> <sup>-/-</sup> |          |       | Day of death         |
|------------------------------------------------------------|-----------------------------------------------------------------------------------------------------------------------------|----------|-------|----------------------|
| Born mice                                                  | expected                                                                                                                    | observed |       |                      |
| Genotype                                                   | %                                                                                                                           | n        | %     |                      |
| <i>Rela</i> <sup>WT/WT</sup> , <i>Tnfr1</i> <sup>-/-</sup> | 25.0%                                                                                                                       | 4        | 14.3% |                      |
| <i>Rela</i> <sup>WT/-</sup> , <i>Tnfr1</i> <sup>-/-</sup>  | 50.0%                                                                                                                       | 20       | 71.4% |                      |
| <i>Rela</i> <sup>-/-</sup> , <i>Tnfr1</i> <sup>-/-</sup>   | 25.0%                                                                                                                       | 4        | 14.3% | P33, 3x sacrifice P2 |
| Total                                                      |                                                                                                                             | 28       |       |                      |

**C**

| Parental genotypes                                                 | F: <i>Rela</i> <sup>WT/-</sup> , <i>Ripk1</i> <sup>D138N/D138N</sup> X M: <i>Rela</i> <sup>WT/-</sup> , <i>Ripk1</i> <sup>D138N/D138N</sup> |          |       | Day of death              |
|--------------------------------------------------------------------|---------------------------------------------------------------------------------------------------------------------------------------------|----------|-------|---------------------------|
| Born mice                                                          | expected                                                                                                                                    | observed |       |                           |
| Genotype                                                           | %                                                                                                                                           | n        | %     |                           |
| <i>Rela</i> <sup>WT/WT</sup> , <i>Ripk1</i> <sup>D138N/D138N</sup> | 25.0%                                                                                                                                       | 12       | 26.7% |                           |
| <i>Rela</i> <sup>WT/-</sup> , <i>Ripk1</i> <sup>D138N/D138N</sup>  | 50.0%                                                                                                                                       | 26       | 57.8% |                           |
| <i>Rela</i> <sup>-/-</sup> , <i>Ripk1</i> <sup>D138N/D138N</sup>   | 25.0%                                                                                                                                       | 7        | 15.6% | 3x P6; P12; P27; P33; P34 |
| Total                                                              |                                                                                                                                             | 45       |       |                           |
| E12.5 – E14.5 Embryos                                              | expected                                                                                                                                    | observed |       |                           |
| Genotype                                                           | %                                                                                                                                           | n        | %     |                           |
| <i>Rela</i> <sup>WT/WT</sup> , <i>Ripk1</i> <sup>D138N/D138N</sup> | 25.0%                                                                                                                                       | 12       | 25.5% |                           |
| <i>Rela</i> <sup>WT/-</sup> , <i>Ripk1</i> <sup>D138N/D138N</sup>  | 50.0%                                                                                                                                       | 25       | 53.2% |                           |
| <i>Rela</i> <sup>-/-</sup> , <i>Ripk1</i> <sup>D138N/D138N</sup>   | 25.0%                                                                                                                                       | 10       | 21.3% |                           |
| Total                                                              |                                                                                                                                             | 47       |       |                           |

**D**

| Parental genotypes                                                 | F: <i>Rela</i> <sup>WT/-</sup> , <i>Ripk1</i> <sup>D138N/WT</sup> X M: <i>Rela</i> <sup>WT/-</sup> , <i>Ripk1</i> <sup>D138N/D138N</sup> |          |       | Day of death               |
|--------------------------------------------------------------------|------------------------------------------------------------------------------------------------------------------------------------------|----------|-------|----------------------------|
| Born mice                                                          | expected                                                                                                                                 | observed |       |                            |
| Genotype                                                           | %                                                                                                                                        | n        | %     |                            |
| <i>Rela</i> <sup>WT/WT</sup> , <i>Ripk1</i> <sup>D138N/WT</sup>    | 12.5%                                                                                                                                    | 8        | 17.0% |                            |
| <i>Rela</i> <sup>WT/WT</sup> , <i>Ripk1</i> <sup>D138N/D138N</sup> | 12.5%                                                                                                                                    | 9        | 19.1% |                            |
| <i>Rela</i> <sup>WT/-</sup> , <i>Ripk1</i> <sup>D138N/WT</sup>     | 25.0%                                                                                                                                    | 13       | 27.7% |                            |
| <i>Rela</i> <sup>WT/-</sup> , <i>Ripk1</i> <sup>D138N/D138N</sup>  | 25.0%                                                                                                                                    | 11       | 23.4% |                            |
| <i>Rela</i> <sup>-/-</sup> , <i>Ripk1</i> <sup>D138N/WT</sup>      | 12.5%                                                                                                                                    | 1        | 2.1%  | P12                        |
| <i>Rela</i> <sup>-/-</sup> , <i>Ripk1</i> <sup>D138N/D138N</sup>   | 12.5%                                                                                                                                    | 5        | 10.6% | P17; P15; 3x sacrifice P20 |
| Total                                                              |                                                                                                                                          | 43       |       |                            |

**E**

| Parental genotypes                                                                                                                     | F: <i>Nemo</i> <sup>WT/-</sup> , <i>Ripk1</i> <sup>D138N/D138N</sup> or F: <i>Nemo</i> <sup>FL/-</sup> , <i>Ripk1</i> <sup>D138N/D138N</sup> X M: <i>Ripk1</i> <sup>D138N/D138N</sup> |          |       |
|----------------------------------------------------------------------------------------------------------------------------------------|---------------------------------------------------------------------------------------------------------------------------------------------------------------------------------------|----------|-------|
| Born male mice                                                                                                                         | expected                                                                                                                                                                              | observed |       |
| Genotype                                                                                                                               | %                                                                                                                                                                                     | n        | %     |
| <i>Nemo</i> <sup>WT/Y</sup> , <i>Ripk1</i> <sup>D138N/D138N</sup> or <i>Nemo</i> <sup>FL/Y</sup> , <i>Ripk1</i> <sup>D138N/D138N</sup> | 50.0%                                                                                                                                                                                 | 8        | 66.7% |
| <i>Nemo</i> <sup>Y/Y</sup> , <i>Ripk1</i> <sup>D138N/D138N</sup>                                                                       | 50.0%                                                                                                                                                                                 | 4        | 33.3% |
| Total                                                                                                                                  |                                                                                                                                                                                       | 12       |       |

Figure S6 related to Figure 6 and Figure 7

### RIPK1 kinase activity mediates embryonic lethality of *Rela*<sup>-/-</sup> and *Nemo*<sup>-/-</sup> mice.

(A) Table showing the expected Mendelian frequency and the observed frequency of born offspring and E12.5-E14.5 embryos with the indicated genotypes from matings with *Rela*<sup>WT/-</sup> female (F) and *Rela*<sup>WT/-</sup> male (M) mice.

(B) Table showing the expected Mendelian frequency and the observed frequency of born offspring with the indicated genotypes from matings with *Rela*<sup>WT/-</sup>, *Tnfr1*<sup>-/-</sup> female (F) and *Rela*<sup>WT/-</sup>, *Tnfr1*<sup>-/-</sup> male (M) mice. The last column indicates the day of death or day of sacrifice of *Rela*<sup>-/-</sup>, *Tnfr1*<sup>-/-</sup> offspring.

(C) Table showing the expected Mendelian frequency and the observed frequency of born offspring and E12.5-E14.5 embryos with the indicated genotypes from matings with *Rela*<sup>WT/-</sup>, *Ripk1*<sup>D138N/D138N</sup> female (F) and *Rela*<sup>WT/-</sup>, *Ripk1*<sup>D138N/D138N</sup> male (M) mice. The last column indicates the day of death or day of sacrifice of *Rela*<sup>-/-</sup>, *Ripk1*<sup>D138N/D138N</sup> mice.

(D) Table showing the expected Mendelian frequency and the observed frequency of born offspring with the indicated genotypes from matings with *Rela*<sup>WT/-</sup>, *Ripk1*<sup>WT/D138N</sup> female (F) and *Rela*<sup>WT/-</sup>, *Ripk1*<sup>D138N/D138N</sup> male (M) mice. The last column indicates the day of death or day of sacrifice of *Rela*<sup>-/-</sup>, *Ripk1*<sup>D138N/D138N</sup> and *Rela*<sup>-/-</sup>, *Ripk1*<sup>WT/D138N</sup> mice.

(E) Table showing the expected Mendelian frequency and the observed frequency of born male offspring with the indicated genotypes from *Nemo*<sup>WT/-</sup>, *Ripk1*<sup>D138N/D138N</sup> or *Nemo*<sup>FL/-</sup>, *Ripk1*<sup>D138N/D138N</sup> females (F) mated to *Ripk1*<sup>D138N/138N</sup> males (M). *Nemo*<sup>-Y</sup>; *Ripk1*<sup>D138N/D138N</sup> pups were dead by P3.

## Supplemental Experimental Procedures

### Mice

*Nemo*<sup>FL</sup> (*Ikkbg*<sup>fl</sup>) (Schmidt-Supprian et al., 2000), *Rela*<sup>FL</sup> (Luedde et al., 2008), *Fadd*<sup>FL</sup> (Welz et al., 2011) and *Ripk1*<sup>D138N/D138N</sup> mice (Polykratis et al., 2014) were generated by gene targeting in C57BL/6 ES cells. *Villin-cre* (Madison et al., 2002), *Villin-creER*<sup>T2</sup> (el Marjou et al., 2004), *Tnfr1*<sup>FL</sup> (*Tnfrsf1a*<sup>fl</sup>) (Van Hauwermeiren et al., 2013), *Trailr2*<sup>FL</sup> (*Tnfrsf10b*<sup>fl</sup>) (Grosse-Wilde et al., 2008), *Fas*<sup>FL</sup> (Hao et al., 2004), *Relb*<sup>FL</sup> (Powolny-Budnicka et al., 2011), *c-Rel*<sup>FL</sup> (Heise et al., 2014) and *Ripk3*<sup>-/-</sup> mice (Newton et al., 2004) were backcrossed for at least 10 generations into the C57BL/6 genetic background. *Villin-creER*<sup>T2</sup> recombinase activity was induced by 5 daily intraperitoneal administrations of 1 mg tamoxifen dissolved in corn oil/DMSO. Littermates not carrying the Cre transgenes were used as controls in all experiments. Mice were analyzed at the age of 2-4 months. Mice of the indicated genotype were assigned at random to groups. Mouse studies were performed in a blinded fashion.

### Quantitative RT-PCR

Total RNA was extracted with Trizol Reagent (Life Technologies) and RNeasy Columns (Qiagen). cDNA was prepared with Superscript III cDNA-synthesis Kit (Life Technologies). qRT-PCR was performed with TaqMan probes (Life Technologies) with TATA-box-binding protein (*Tbp*) and *Gapdh* serving as reference genes. Data were analyzed according to the  $\Delta\Delta CT$  method and are presented in dot plot graphs as fold change (relative mRNA expression) relative to Cre negative littermates. Primer sequences are available upon request.

### FACS analysis of Fas expression on IECs

Small intestinal IECs were isolated as described. For viability assessment cells were stained with fixable viability dye eFluor 780 (eBioscience), epithelial cells were identified as Epcam1-high with anti-EpCAM1/CD326-FITC (eBioscience) and expression of Fas was determined with anti-Fas/CD95-PE (BD Pharmingen) antibodies. Data were acquired with LSRFortessa, BD and analysis was performed with BD FACSDiva Software v8.0, plots were prepared with FlowJo Version 7.6.5 software.

### Assessment of deletion efficiency of *Trailr2*

Deletion efficiency of *Trailr2* was assessed on genomic DNA isolated from small intestinal IECs as described before (Ehlken et al., 2014). Results are depicted as  $1 - [2^{-(Ct\ deleted\ amplicon - Ct\ control\ amplicon)}]$ .

### Histopathological evaluation of H&E stained tissue sections

Histopathological evaluation of tissue sections was performed on 3 $\mu$ m H&E stained intestinal tissue sections in a blinded fashion as described previously (Adolph et al., 2013). Inflammation scores are composed of four parameters, tissue damage scores are represented by the sum of three parameters that were multiplied with a factor taking into account the fraction of tissue being affected. In brief, inflammation was assessed by the presence of infiltrating mononuclear cells, polymorphonuclear cells and lymphocytic cells (scores from 0 to 3, with 0 absent, 1 mild, 2 moderate, 3 severe), and the localization of inflammatory infiltrates (0 absent, 1 mucosal, 2 submucosal, 3 transmural extending into muscularis and serosa, and 4 diffuse). For the evaluation of tissue damage four scores were ascribed to crypt hyperplasia, epithelial injury and death of epithelial cells (0 absent, 1 mild, 2 moderate and 3 severe). The sum of these inflammation or tissue damage scores were then multiplied by a factor according to the fraction of the tissue being affected: 1, < 10%; 2, 10-25%; 3, 25-50%; and 4, >50%. The total histological score represents the sum of inflammation and damage marks.

Paneth cell scores describe morphology and abundance of Paneth cells assessed on H&E stained paraffin sections. According to the extent of morphological alterations 5 scores were used to characterize Paneth cells describing cell shape and size, and the appearance of eosinophilic secretory granules. 0 characterizes normal, differentiated Paneth cells with well-formed roundish secretory granules; a score of 1 describes mild defects in secretory granule formation and mild alterations in cell shape; 2 indicates mild alterations in cell size and shape and moderate changes in granule appearance affecting less than half of the Paneth cells within a crypt; score 3 represents Paneth cells with more overt defects in their morphology involving more than half of the Paneth cells in a crypt; score 4 characterized severe Paneth cell abnormalities clearly detectable at lower power magnifications.

Five scores were employed to characterize relative Paneth cell numbers. 0 corresponds to normal Paneth cell numbers. A score of 1 characterizes a mild reduction in Paneth cell numbers per crypt. Score 2 corresponds to up to 25% reduction of Paneth cells per crypt, already noticeable at lower power magnifications. Score 3 describes an about 50% reduction in Paneth cells with most crypts still harboring Paneth cells. 4 was assigned when remaining Paneth cells accounted for less than 30% of Paneth cells in a wild type status (score 0) and stretches of crypts devoid of Paneth cells were identified.

### Supplemental References

- Adolph, T.E., Tomczak, M.F., Niederreiter, L., Ko, H.J., Bock, J., Martinez-Naves, E., Glickman, J.N., Tschurtschenthaler, M., Hartwig, J., Hosomi, S., *et al.* (2013). Paneth cells as a site of origin for intestinal inflammation. *Nature* *503*, 272-276.
- Ehlken, H., Krishna-Subramanian, S., Ochoa-Callejero, L., Kondylis, V., Nadi, N.E., Straub, B.K., Schirmacher, P., Walczak, H., Kollias, G., and Pasparakis, M. (2014). Death receptor-independent FADD signalling triggers hepatitis and hepatocellular carcinoma in mice with liver parenchymal cell-specific NEMO knockout. *Cell Death Differ* *21*, 1721-1732.
- el Marjou, F., Janssen, K.P., Chang, B.H., Li, M., Hindie, V., Chan, L., Louvard, D., Chambon, P., Metzger, D., and Robine, S. (2004). Tissue-specific and inducible Cre-mediated recombination in the gut epithelium. *Genesis* *39*, 186-193.
- Grosse-Wilde, A., Voloshanenko, O., Bailey, S.L., Longton, G.M., Schaefer, U., Csernok, A.I., Schutz, G., Greiner, E.F., Kemp, C.J., and Walczak, H. (2008). TRAIL-R deficiency in mice enhances lymph node metastasis without affecting primary tumor development. *J Clin Invest* *118*, 100-110.
- Hao, Z., Hampel, B., Yagita, H., and Rajewsky, K. (2004). T cell-specific ablation of Fas leads to Fas ligand-mediated lymphocyte depletion and inflammatory pulmonary fibrosis. *J Exp Med* *199*, 1355-1365.
- Heise, N., De Silva, N.S., Silva, K., Carette, A., Simonetti, G., Pasparakis, M., and Klein, U. (2014). Germinal center B cell maintenance and differentiation are controlled by distinct NF-kappaB transcription factor subunits. *J Exp Med* *211*, 2103-2118.
- Luedde, T., Heinrichsdorff, J., de Lorenzi, R., De Vos, R., Roskams, T., and Pasparakis, M. (2008). IKK1 and IKK2 cooperate to maintain bile duct integrity in the liver. *Proc Natl Acad Sci U S A* *105*, 9733-9738.
- Madison, B.B., Dunbar, L., Qiao, X.T., Braunstein, K., Braunstein, E., and Gumucio, D.L. (2002). Cis elements of the villin gene control expression in restricted domains of the vertical (crypt) and horizontal (duodenum, cecum) axes of the intestine. *J Biol Chem* *277*, 33275-33283.
- Newton, K., Sun, X., and Dixit, V.M. (2004). Kinase RIP3 is dispensable for normal NF-kappa B signaling by the B-cell and T-cell receptors, tumor necrosis factor receptor 1, and Toll-like receptors 2 and 4. *Mol Cell Biol* *24*, 1464-1469.
- Polykratis, A., Hermance, N., Zelic, M., Roderick, J., Kim, C., Van, T.M., Lee, T.H., Chan, F.K., Pasparakis, M., and Kelliher, M.A. (2014). Cutting edge: RIPK1 Kinase inactive mice are viable and protected from TNF-induced necroptosis in vivo. *J Immunol* *193*, 1539-1543.
- Powolny-Budnicka, I., Riemann, M., Tanzer, S., Schmid, R.M., Hehlhans, T., and Weih, F. (2011). RelA and RelB transcription factors in distinct thymocyte populations control lymphotoxin-dependent interleukin-17 production in gammadelta T cells. *Immunity* *34*, 364-374.
- Schmidt-Supprian, M., Bloch, W., Courtois, G., Addicks, K., Israel, A., Rajewsky, K., and Pasparakis, M. (2000). NEMO/IKK gamma-deficient mice model incontinentia pigmenti. *Mol Cell* *5*, 981-992.
- Van Hauwermeiren, F., Armaka, M., Karagianni, N., Kranidioti, K., Vandenbroucke, R.E., Loges, S., Van Roy, M., Staelens, J., Puimege, L., Palagani, A., *et al.* (2013). Safe TNF-based antitumor therapy following p55TNFR reduction in intestinal epithelium. *J Clin Invest* *123*, 2590-2603.
- Welz, P.S., Wullaert, A., Vlantis, K., Kondylis, V., Fernandez-Majada, V., Ermolaeva, M., Kirsch, P., Sterner-Kock, A., van Loo, G., and Pasparakis, M. (2011). FADD prevents RIP3-mediated epithelial cell necrosis and chronic intestinal inflammation. *Nature* *477*, 330-334.
